# Supplementary material
Source: PubMed Central journal article supplement (PMC55751)
Supplement: nar_29_12_2464__1.pdf [file nar_29_12_2464__1.pdf]

## SUPPLEMENTARY MATERIAL

Table 1. Synthetic oligonucleotides used in the experiments

|                                              |    |                                                                                                                             |
|----------------------------------------------|----|-----------------------------------------------------------------------------------------------------------------------------|
| <u>dsDNA (strand exchange):</u>              |    |                                                                                                                             |
| Homol_51                                     | 3' | TGCCGATGTGATCTTCCTGTCATACCGGATAGACGCGAGACGACTTCGGTC 5'                                                                      |
| Compl_61                                     | 5' | TAACTACGGCTACACTAGAAGGACAGTATGGCCATCTGCGCTCTGCTGAAGCCAGTTACC 3'                                                             |
| <u>dsDNA (spontaneous branch migration):</u> |    |                                                                                                                             |
| Homol_52                                     | 3' | GTCTCGCGTCTATCCGGTATGACAGGAAGATCACATCGGCATCAATCCGGTG 5'                                                                     |
| Compl_72                                     | 5' | CCGAAGGTAACCTGGCTTCAGCAGAGCGCAGATAGGCCATACTGTCCCTCTAGTGTAGCCGTAGTTAGGCCAC 3'                                                |
| <u>ssDNAs (strand exchange):</u>             |    |                                                                                                                             |
| Homolog                                      | 5' | GTGGCCTAACTACGGCTACACTAGAAGGACAGTATGGCCATCTGCGCTCTGCTGAAGCCAGTTACCTTCGG 3'                                                  |
| Subst ≈2                                     | 5' | GTGGCCTAACTACGGCTACACTAGAAGGACAGTATG <u>AT</u> CTATCTGCGCTCTGCTGAAGCCAGTTACCTTCGG 3'                                        |
| Subst ≈4                                     | 5' | GTGGCCTAACTACGGCTACACTAGAAGGACAGTAT <u>TTGG</u> TATCTGCGCTCTGCTGAAGCCAGTTACCTTCGG 3'                                        |
| Subst ≈10                                    | 5' | GTGGCCTAACTACGGCTACACTAGAAGGACAGG <u>CATTAGAC</u> CTGCGCTCTGCTGAAGCCAGTTACCTTCGG 3'                                         |
| Deletion -1                                  | 5' | GTGGCCTAACTACGGCTACACTAGAAGGACAGTATGG <u>_</u> CTATCTGCGCTCTGCTGAAGCCAGTTACCTTCGG 3'                                        |
| Deletion -2                                  | 5' | GTGGCCTAACTACGGCTACACTAGAAGGACAGTATG <u>_</u> CTATCTGCGCTCTGCTGAAGCCAGTTACCTTCGG 3'                                         |
| Deletion -3                                  | 5' | GTGGCCTAACTACGGCTACACTAGAAGGACAGTATG <u>_</u> TATCTGCGCTCTGCTGAAGCCAGTTACCTTCGG 3'                                          |
| Deletion -4                                  | 5' | GTGGCCTAACTACGGCTACACTAGAAGGACAGTAT <u>_</u> TATCTGCGCTCTGCTGAAGCCAGTTACCTTCGG 3'                                           |
| Insertion +1                                 | 5' | GTGGCCTAACTACGGCTACACTAGAAGGACAGTATGGA <u>CC</u> TATCTGCGCTCTGCTGAAGCCAGTTACCTTCGG 3'                                       |
| Insertion +2                                 | 5' | GTGGCCTAACTACGGCTACACTAGAAGGACAGTATGGAA <u>CC</u> TATCTGCGCTCTGCTGAAGCCAGTTACCTTCGG 3'                                      |
| Insertion +3                                 | 5' | GTGGCCTAACTACGGCTACACTAGAAGGACAGTATGGATA <u>CC</u> TATCTGCGCTCTGCTGAAGCCAGTTACCTTCGG 3'                                     |
| Insertion +4                                 | 5' | GTGGCCTAACTACGGCTACACTAGAAGGACAGTATGGACG <u>TC</u> TATCTGCGCTCTGCTGAAGCCAGTTACCTTCGG 3'                                     |
| <u>ssDNAs (unwinding assays):</u>            |    |                                                                                                                             |
| 116                                          | 5' | TGCTACAGAGTTCTTGAAGTGGTGGCCTAACTACGGCTACACTAGAAGGACAGTATTTGGTATCTGCGCTCTGCTGAA<br>GCCAGTTACCTTCGGAAAAAGAGTTGGTAGCTCTTGAT 3' |
| 94                                           | 5' | TCTTGAAGTGGTGGCCTAACTACGGCTACACTAGAAGGACAGTATTTGGTATCTGCGCTCTGCTGAAGCCAGTTACCT<br>TCGGAAAAAGAGTTGG 3'                       |
| 72                                           | 5' | GTGGCCTAACTACGGCTACACTAGAAGGACAGTATTTGGTATCTGCGCTCTGCTGAAGCCAGTTACCTTCGG 3'                                                 |
| 72_4Sub                                      | 5' | GTGGCCTAGCTACGGCT <u>CA</u> CTAGAAGTACAGTATGTTGGTATCTGCGCTCTGCTGAAGCCAGTTACCTTCGG 3'                                        |
| 72_4Ins                                      | 5' | GTGGCCTAA <u>CT</u> ACGGCTACACTAGAAGTACAGTATTTGGTATCTGCGCTCTGCTGAAGCCAGTTACCTTCGG 3'                                        |
| 94_Ins72                                     | 5' | TGCTACAGAG <u>CT</u> TTCTTGAAGTGGTGGCCTAACTACGGCTACACTAGAAGGACAGTATTTGGTATCTGCGCTCTGCTG<br>AAGCCTGAGTTACCTTCG 3'            |
| 72_3'50                                      | 5' | <u>GCTACAGCGTACAAGGTC</u> AAGGAGAAGGACAGTATTTGGTATCTGCGCTCTGCTGAAGCCAGTTACCTTCGG 3'                                         |

The upper two rows show the ssDNAs used to create the dsDNAs for the strand exchange assays and the spontaneous branch migration assays, respectively. The middle part shows the ssDNAs, which have been used in both types of experiments. The lower part shows the sequences of oligonucleotides that have been employed in the topological pairing assays with pUC18 as a closed circular DNA. Heterologous regions are underlined.
